# Supplementary material for: Non-covalent interactions (NCIs) in π-conjugated functional materials: advances and perspectives
Source: Royal Society of Chemistry journal article supplement (doi:10.1039/d2cs00262k), 2023-01-01
Supplement: d2cs00262k1.pdf [file d2cs00262k1.pdf]

## **Non-covalent interactions (NCIs) in $\pi$ -conjugated functional materials: Advances and perspectives**

Ashanul Haque,<sup>\*a</sup> Khalaf M. Alenezi,<sup>a</sup> Muhammad S. Khan,<sup>\*b</sup> Wai-Yeung Wong<sup>\*c</sup> and Paul R. Raithby<sup>\*d</sup>

<sup>a</sup>Department of Chemistry, College of Science, University of Hail, Kingdom of Saudi Arabia. E-mail: [a.haque@uoh.edu.sa](mailto:a.haque@uoh.edu.sa), [haque\\_chem@yahoo.com](mailto:haque_chem@yahoo.com)

<sup>b</sup>Department of Chemistry, Sultan Qaboos University, Al-Khod, Muscat, Oman. E-mail: [msk@squ.edu.om](mailto:msk@squ.edu.om)

<sup>c</sup>Department of Applied Biology and Chemical Technology and Research Institute for Smart Energy, The Hong Kong Polytechnic University, Hung Hom, Kowloon, Hong Kong, P. R. China. E-mail: [wai-yeung.wong@polyu.edu.hk](mailto:wai-yeung.wong@polyu.edu.hk)

<sup>d</sup>Department of Chemistry, University of Bath, Claverton Down, Bath, Avon BA2 7AY, United Kingdom. E-mail: [p.r.raithby@bath.ac.uk](mailto:p.r.raithby@bath.ac.uk)

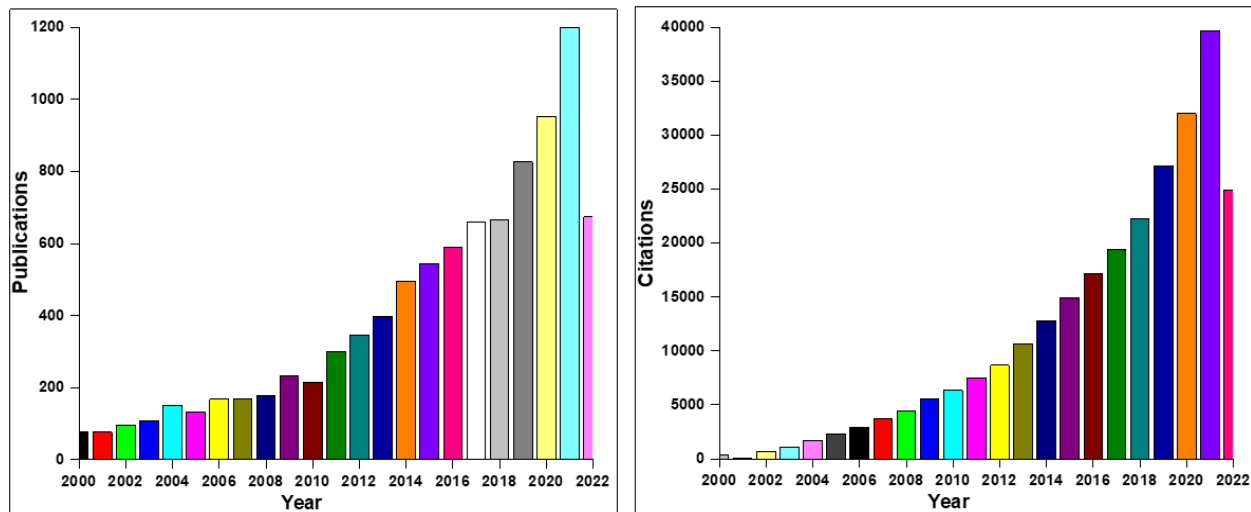

**Fig. S1:** Histogram showing the number of publications and citations on the topic “*non-covalent interactions*”. (Data searched from Web of Science on September 2, 2022. These materials are reproduced under a license from Thomson Reuters. You may not copy or re-distribute these materials in whole or in part without the prior written consent of Thomson Reuters).

**Table T1:** Intermolecular interactions characterization techniques in  $\pi$ -conjugated materials.

| Experimental techniques              | NCI studied                                                                                       | References |
|--------------------------------------|---------------------------------------------------------------------------------------------------|------------|
| IR/Raman                             | Hydrogen bonding, Metal coordination                                                              | 1, 2, 3    |
| NMR                                  | Hydrogen bonding                                                                                  | 1, 2       |
| NEXAFS                               | Metal insertion                                                                                   | 3          |
| AFM                                  | Hydrogen bonding, van der Waals interactions, host-guest interactions, cation- $\pi$ interactions | 4-10       |
| STM                                  | Short-range Pauli repulsion, van der Waals forces, electrostatic repulsions, and halogen bonds    | 11-13      |
| Kelvin probe force microscopy (KPFM) | $\sigma$ -hole interactions                                                                       | 14, 15     |
| 3D Electron Diffraction              | Multiple NCIs                                                                                     | 16         |
| DFM                                  | H-bonding                                                                                         | 9          |

### References

1. M. U. Ocheje, B. P. Charron, Y.-H. Cheng, C.-H. Chuang, A. Soldera, Y.-C. Chiu and S. Rondeau-Gagné, *Macromolecules*, 2018, **51**, 1336-1344.
2. J. Yao, C. Yu, Z. Liu, H. Luo, Y. Yang, G. Zhang and D. Zhang, *J. Am. Chem. Soc.*, 2016, **138**, 173-185.
3. K. Bae, D. G. Lee, M. I. Khazi and J. M. Kim, *Macromolecules*, 2022, **55**, 2882-2891.
4. H. Mönig, S. Amirjalayer, A. Timmer, Z. Hu, L. Liu, O. Díaz Arado, M. Cnudde, C. A. Strassert, W. Ji and M. Rohlfing, *Nature Nanotechnology*, 2018, **13**, 371-375.
5. J. Zhang, P. Chen, B. Yuan, W. Ji, Z. Cheng and X. Qiu, *Science*, 2013, **342**, 611-614.
6. J. Nie, Y. Deng, F. Tian, S. Shi and P. Zheng, *Nano research*, 2022, **15**, 4251-4257.
7. C.-I. Chiang, C. Xu, Z. Han and W. Ho, *Science*, 2014, **344**, 885-888.
8. L. Gross, F. Mohn, N. Moll, P. Liljeroth and G. Meyer, *Science*, 2009, **325**, 1110-1114.
9. A. Sweetman, S. P. Jarvis, H. Sang, I. Lekkas, P. Rahe, Y. Wang, J. Wang, N. R. Champness, L. Kantorovich and P. Moriarty, *Nature Communications*, 2014, **5**, 1-7.
10. S. Kawai, A. S. Foster, T. Björkman, S. Nowakowska, J. Björk, F. F. Canova, L. H. Gade, T. A. Jung and E. Meyer, *Nature communications*, 2016, **7**, 1-7.
11. G. Kichin, C. Weiss, C. Wagner, F. S. Tautz and R. Temirov, *J. Am. Chem. Soc.*, 2011, **133**, 16847-16851.
12. Z. Han, G. Czap, C.-I. Chiang, C. Xu, P. J. Wagner, X. Wei, Y. Zhang, R. Wu and W. Ho, *Science*, 2017, **358**, 206-210.
13. J. Lawrence, G. C. Sosso, L. Đorđević, H. Pinfold, D. Bonifazi and G. Costantini, *Nature communications*, 2020, **11**, 1-7.
14. F. Mohn, B. Schuler, L. Gross and G. Meyer, *Appl. Phys. Lett.*, 2013, **102**, 073109.
15. B. Mallada, A. Gallardo, M. Lamanec, B. De La Torre, V. Špirko, P. Hobza and P. Jelinek, *Science*, 2021, **374**, 863-867.
16. Y. Luo, M. T. Clabbers, J. Qiao, Z. Yuan, W. Yang and X. Zou, *J. Am. Chem. Soc.*, 2022.
